# Supplementary material for: Effects of Combined Application of Biogas Slurry and Chemical Fertilizer on Soil Aggregation and C/N Distribution in an Ultisol
Source: PubMed Central journal article supplement (PMC5268777; doi:10.1371/journal.pone.0170491), 2017-01-26
Supplement: pone.0170491.s001.pdf [file pone.0170491.s001.pdf]

**S1 Table ANOVA source information for Table 3**

|                                        |           |                       |                    |                |                |
|----------------------------------------|-----------|-----------------------|--------------------|----------------|----------------|
| <b>Bulk density (g/cm<sup>3</sup>)</b> | <b>df</b> | <b>Sum of squares</b> | <b>Mean square</b> | <b>F value</b> | <b>p value</b> |
| <b>Between Groups</b>                  | 5         | 0.033                 | 0.007              | 47.803         | 0.000          |
| <b>Within Groups</b>                   | 12        | 0.002                 | 0.000              |                |                |
| <b>Total</b>                           | 17        | 0.035                 |                    |                |                |
| <b>Porosity (%)</b>                    | <b>df</b> | <b>Sum of squares</b> | <b>Mean square</b> | <b>F value</b> | <b>p value</b> |
| <b>Between Groups</b>                  | 5         | 47.584                | 9.517              | 47.803         | 0.000          |
| <b>Within Groups</b>                   | 12        | 2.389                 | 0.199              |                |                |
| <b>Total</b>                           | 17        | 49.973                |                    |                |                |
| <b>SOC</b>                             | <b>df</b> | <b>Sum of squares</b> | <b>Mean square</b> | <b>F value</b> | <b>p value</b> |
| <b>Between Groups</b>                  | 5         | 4.984                 | 0.997              | 7.853          | 0.002          |
| <b>Within Groups</b>                   | 12        | 1.523                 | 0.127              |                |                |
| <b>Total</b>                           | 17        | 6.507                 |                    |                |                |
| <b>TN</b>                              | <b>df</b> | <b>Sum of squares</b> | <b>Mean square</b> | <b>F value</b> | <b>p value</b> |
| <b>Between Groups</b>                  | 5         | 0.068                 | 0.014              | 40.800         | 0.000          |
| <b>Within Groups</b>                   | 12        | 0.004                 | 0.000              |                |                |
| <b>MWD</b>                             | 17        | 0.072                 |                    |                |                |
| <b>0.5 - 0.25 mm</b>                   | <b>df</b> | <b>Sum of squares</b> | <b>Mean square</b> | <b>F value</b> | <b>p value</b> |
| <b>Between Groups</b>                  | 5         | 4.574                 | 0.915              | 15.315         | 0.000          |
| <b>Within Groups</b>                   | 12        | 0.717                 | 0.060              |                |                |
| <b>GMD</b>                             | 17        | 5.291                 |                    |                |                |
| <b>&lt; 0.25 mm</b>                    | <b>df</b> | <b>Sum of squares</b> | <b>Mean square</b> | <b>F value</b> | <b>p value</b> |
| <b>Between Groups</b>                  | 5         | 1.992                 | 0.398              | 23.239         | 0.000          |
| <b>Within Groups</b>                   | 12        | 0.206                 | 0.017              |                |                |
| <b>Total</b>                           | 17        | 2.198                 |                    |                |                |
