# Supplementary material for: Effects of Combined Application of Biogas Slurry and Chemical Fertilizer on Soil Aggregation and C/N Distribution in an Ultisol
Source: PubMed Central journal article supplement (PMC5268777; doi:10.1371/journal.pone.0170491), 2017-01-26
Supplement: pone.0170491.s002.pdf [file pone.0170491.s002.pdf]

**S2 Table ANOVA source information for Table 4**

|                       |           |                       |                    |                |                |
|-----------------------|-----------|-----------------------|--------------------|----------------|----------------|
| <b>&gt;5 mm</b>       | <b>df</b> | <b>Sum of squares</b> | <b>Mean square</b> | <b>F value</b> | <b>p value</b> |
| <b>Between Groups</b> | 5         | 163130.363            | 32626.073          | 1153.625       | 0.000          |
| <b>Within Groups</b>  | 12        | 339.376               | 28.281             |                |                |
| <b>Total</b>          | 17        | 163469.739            |                    |                |                |
| <b>5 - 2 mm</b>       | <b>df</b> | <b>Sum of squares</b> | <b>Mean square</b> | <b>F value</b> | <b>p value</b> |
| <b>Between Groups</b> | 5         | 2099.500              | 419.900            | 167.444        | 0.000          |
| <b>Within Groups</b>  | 12        | 30.093                | 2.508              |                |                |
| <b>Total</b>          | 17        | 2129.593              |                    |                |                |
| <b>2 - 1 mm</b>       | <b>df</b> | <b>Sum of squares</b> | <b>Mean square</b> | <b>F value</b> | <b>p value</b> |
| <b>Between Groups</b> | 5         | 357.255               | 71.451             | 67.005         | 0.000          |
| <b>Within Groups</b>  | 12        | 12.796                | 1.066              |                |                |
| <b>Total</b>          | 17        | 370.051               |                    |                |                |
| <b>1.0 - 0.5 mm</b>   | <b>df</b> | <b>Sum of squares</b> | <b>Mean square</b> | <b>F value</b> | <b>p value</b> |
| <b>Between Groups</b> | 5         | 8775.192              | 1755.038           | 391.952        | 0.000          |
| <b>Within Groups</b>  | 12        | 53.732                | 4.478              |                |                |
| <b>Total</b>          | 17        | 8828.924              |                    |                |                |
| <b>0.5 - 0.25 mm</b>  | <b>df</b> | <b>Sum of squares</b> | <b>Mean square</b> | <b>F value</b> | <b>p value</b> |
| <b>Between Groups</b> | 5         | 1494.030              | 298.806            | 350.410        | 0.000          |
| <b>Within Groups</b>  | 12        | 10.233                | 0.853              |                |                |
| <b>Total</b>          | 17        | 1504.262              |                    |                |                |
| <b>&lt; 0.25 mm</b>   | <b>df</b> | <b>Sum of squares</b> | <b>Mean square</b> | <b>F value</b> | <b>p value</b> |
| <b>Between Groups</b> | 5         | 2998.670              | 599.734            | 333.951        | 0.000          |
| <b>Within Groups</b>  | 12        | 21.550                | 1.796              |                |                |
| <b>Total</b>          | 17        | 3020.220              |                    |                |                |
