# Supplementary material for: Effects of Combined Application of Biogas Slurry and Chemical Fertilizer on Soil Aggregation and C/N Distribution in an Ultisol
Source: PubMed Central journal article supplement (PMC5268777; doi:10.1371/journal.pone.0170491), 2017-01-26
Supplement: pone.0170491.s003.pdf [file pone.0170491.s003.pdf]

**S3 Table ANOVA source information for Table 5**

|                       |           |                       |                    |                |                |
|-----------------------|-----------|-----------------------|--------------------|----------------|----------------|
| <b>&gt;5 mm</b>       | <b>df</b> | <b>Sum of squares</b> | <b>Mean square</b> | <b>F value</b> | <b>p value</b> |
| <b>Between Groups</b> | 5         | 1,867.460             | 373.492            | 562.237        | 0.000          |
| <b>Within Groups</b>  | 12        | 7.972                 | 0.664              |                |                |
| <b>Total</b>          | 17        | 1,875.432             |                    |                |                |
| <b>5 - 2 mm</b>       | <b>df</b> | <b>Sum of squares</b> | <b>Mean square</b> | <b>F value</b> | <b>p value</b> |
| <b>Between Groups</b> | 5         | 20.202                | 4.040              | 121.806        | 0.000          |
| <b>Within Groups</b>  | 12        | 0.398                 | 0.033              |                |                |
| <b>Total</b>          | 17        | 20.600                |                    |                |                |
| <b>2 - 1 mm</b>       | <b>df</b> | <b>Sum of squares</b> | <b>Mean square</b> | <b>F value</b> | <b>p value</b> |
| <b>Between Groups</b> | 5         | 5.760                 | 1.152              | 120.089        | 0.000          |
| <b>Within Groups</b>  | 12        | 0.115                 | 0.010              |                |                |
| <b>Total</b>          | 17        | 5.875                 |                    |                |                |
| <b>1.0 - 0.5 mm</b>   | <b>df</b> | <b>Sum of squares</b> | <b>Mean square</b> | <b>F value</b> | <b>p value</b> |
| <b>Between Groups</b> | 5         | 98.514                | 19.703             | 195.917        | 0.000          |
| <b>Within Groups</b>  | 12        | 1.207                 | 0.101              |                |                |
| <b>Total</b>          | 17        | 99.721                |                    |                |                |
| <b>0.5 - 0.25 mm</b>  | <b>df</b> | <b>Sum of squares</b> | <b>Mean square</b> | <b>F value</b> | <b>p value</b> |
| <b>Between Groups</b> | 5         | 23.911                | 4.782              | 531.694        | 0.000          |
| <b>Within Groups</b>  | 12        | 0.108                 | 0.009              |                |                |
| <b>Total</b>          | 17        | 24.019                |                    |                |                |
| <b>&lt; 0.25 mm</b>   | <b>df</b> | <b>Sum of squares</b> | <b>Mean square</b> | <b>F value</b> | <b>p value</b> |
| <b>Between Groups</b> | 5         | 25.933                | 5.187              | 313.498        | 0.000          |
| <b>Within Groups</b>  | 12        | 0.199                 | 0.017              |                |                |
| <b>Total</b>          | 17        | 26.132                |                    |                |                |
