# Supplementary material for: Effects of Combined Application of Biogas Slurry and Chemical Fertilizer on Soil Aggregation and C/N Distribution in an Ultisol
Source: PubMed Central journal article supplement (PMC5268777; doi:10.1371/journal.pone.0170491), 2017-01-26
Supplement: pone.0170491.s004.pdf [file pone.0170491.s004.pdf]

**S4 Table ANOVA source information for Fig 2**

|                       |           |                       |                    |                |                |
|-----------------------|-----------|-----------------------|--------------------|----------------|----------------|
| <b>&gt;5 mm</b>       | <b>df</b> | <b>Sum of squares</b> | <b>Mean square</b> | <b>F value</b> | <b>p value</b> |
| <b>Between Groups</b> | 5         | 777.063               | 155.413            | 11.161         | 0.001          |
| <b>Within Groups</b>  | 10        | 139.246               | 13.925             |                |                |
| <b>Total</b>          | 15        | 916.309               |                    |                |                |
| <b>5 - 2 mm</b>       | <b>df</b> | <b>Sum of squares</b> | <b>Mean square</b> | <b>F value</b> | <b>p value</b> |
| <b>Between Groups</b> | 5         | 26.558                | 5.312              | 4.698          | 0.018          |
| <b>Within Groups</b>  | 10        | 11.307                | 1.131              |                |                |
| <b>Total</b>          | 15        | 37.865                |                    |                |                |
| <b>2 - 1 mm</b>       | <b>df</b> | <b>Sum of squares</b> | <b>Mean square</b> | <b>F value</b> | <b>p value</b> |
| <b>Between Groups</b> | 5         | 9.065                 | 1.813              | 1.591          | 0.249          |
| <b>Within Groups</b>  | 10        | 11.395                | 1.139              |                |                |
| <b>Total</b>          | 15        | 20.459                |                    |                |                |
| <b>1.0 - 0.5 mm</b>   | <b>df</b> | <b>Sum of squares</b> | <b>Mean square</b> | <b>F value</b> | <b>p value</b> |
| <b>Between Groups</b> | 5         | 99.855                | 19.971             | 6.300          | 0.007          |
| <b>Within Groups</b>  | 10        | 31.702                | 3.170              |                |                |
| <b>Total</b>          | 15        | 131.557               |                    |                |                |
| <b>0.5 - 0.25 mm</b>  | <b>df</b> | <b>Sum of squares</b> | <b>Mean square</b> | <b>F value</b> | <b>p value</b> |
| <b>Between Groups</b> | 5         | 41.652                | 8.330              | 14.354         | 0.000          |
| <b>Within Groups</b>  | 10        | 5.803                 | 0.580              |                |                |
| <b>Total</b>          | 15        | 47.456                |                    |                |                |
| <b>&lt; 0.25 mm</b>   | <b>df</b> | <b>Sum of squares</b> | <b>Mean square</b> | <b>F value</b> | <b>p value</b> |
| <b>Between Groups</b> | 5         | 42.792                | 8.558              | 9.654          | 0.001          |
| <b>Within Groups</b>  | 10        | 8.865                 | 0.887              |                |                |
| <b>Total</b>          | 15        | 51.657                |                    |                |                |
