# Supplementary material for: Effects of Combined Application of Biogas Slurry and Chemical Fertilizer on Soil Aggregation and C/N Distribution in an Ultisol
Source: PubMed Central journal article supplement (PMC5268777; doi:10.1371/journal.pone.0170491), 2017-01-26
Supplement: pone.0170491.s005.pdf [file pone.0170491.s005.pdf]

**S5 Table ANOVA source information for Fig 3**

|                       |           |                       |                    |                |                |
|-----------------------|-----------|-----------------------|--------------------|----------------|----------------|
| <b>&gt;5 mm</b>       | <b>df</b> | <b>Sum of squares</b> | <b>Mean square</b> | <b>F value</b> | <b>p value</b> |
| <b>Between Groups</b> | 5         | 7.738                 | 1.548              | 295.681        | 0.000          |
| <b>Within Groups</b>  | 12        | 0.063                 | 0.005              |                |                |
| <b>Total</b>          | 17        | 7.801                 |                    |                |                |
| <b>5 - 2 mm</b>       | <b>df</b> | <b>Sum of squares</b> | <b>Mean square</b> | <b>F value</b> | <b>p value</b> |
| <b>Between Groups</b> | 5         | 0.478                 | 0.096              | 56.128         | 0.000          |
| <b>Within Groups</b>  | 12        | 0.020                 | 0.002              |                |                |
| <b>Total</b>          | 17        | 0.498                 |                    |                |                |
| <b>2 - 1 mm</b>       | <b>df</b> | <b>Sum of squares</b> | <b>Mean square</b> | <b>F value</b> | <b>p value</b> |
| <b>Between Groups</b> | 5         | 0.221                 | 0.044              | 29.581         | 0.000          |
| <b>Within Groups</b>  | 12        | 0.018                 | 0.001              |                |                |
| <b>Total</b>          | 17        | 0.239                 |                    |                |                |
| <b>1.0 - 0.5 mm</b>   | <b>df</b> | <b>Sum of squares</b> | <b>Mean square</b> | <b>F value</b> | <b>p value</b> |
| <b>Between Groups</b> | 5         | 1.626                 | 0.325              | 141.390        | 0.000          |
| <b>Within Groups</b>  | 12        | 0.028                 | 0.002              |                |                |
| <b>Total</b>          | 17        | 1.653                 |                    |                |                |
| <b>0.5 - 0.25 mm</b>  | <b>df</b> | <b>Sum of squares</b> | <b>Mean square</b> | <b>F value</b> | <b>p value</b> |
| <b>Between Groups</b> | 5         | 0.619                 | 0.124              | 102.747        | 0.000          |
| <b>Within Groups</b>  | 12        | 0.014                 | 0.001              |                |                |
| <b>Total</b>          | 17        | 0.633                 |                    |                |                |
| <b>&lt; 0.25 mm</b>   | <b>df</b> | <b>Sum of squares</b> | <b>Mean square</b> | <b>F value</b> | <b>p value</b> |
| <b>Between Groups</b> | 5         | 0.651                 | 0.130              | 75.852         | 0.000          |
| <b>Within Groups</b>  | 12        | 0.021                 | 0.002              |                |                |
| <b>Total</b>          | 17        | 0.672                 |                    |                |                |
