# Supplementary material for: Effects of Combined Application of Biogas Slurry and Chemical Fertilizer on Soil Aggregation and C/N Distribution in an Ultisol
Source: PubMed Central journal article supplement (PMC5268777; doi:10.1371/journal.pone.0170491), 2017-01-26
Supplement: pone.0170491.s006.pdf [file pone.0170491.s006.pdf]

**S6 Table ANOVA source information for Fig 4**

|                       |           |                       |                    |                |                |
|-----------------------|-----------|-----------------------|--------------------|----------------|----------------|
| <b>&gt;5 mm</b>       | <b>df</b> | <b>Sum of squares</b> | <b>Mean square</b> | <b>F value</b> | <b>p value</b> |
| <b>Between Groups</b> | 5         | 0.098                 | 0.020              | 207.754        | 0.000          |
| <b>Within Groups</b>  | 12        | 0.001                 | 0.000              |                |                |
| <b>Total</b>          | 17        | 0.099                 |                    |                |                |
| <b>5 - 2 mm</b>       | <b>df</b> | <b>Sum of squares</b> | <b>Mean square</b> | <b>F value</b> | <b>p value</b> |
| <b>Between Groups</b> | 5         | 0.005                 | 0.001              | 50.784         | 0.000          |
| <b>Within Groups</b>  | 12        | 0.000                 | 0.000              |                |                |
| <b>Total</b>          | 17        | 0.005                 |                    |                |                |
| <b>2 - 1 mm</b>       | <b>df</b> | <b>Sum of squares</b> | <b>Mean square</b> | <b>F value</b> | <b>p value</b> |
| <b>Between Groups</b> | 5         | 0.004                 | 0.001              | 59.407         | 0.000          |
| <b>Within Groups</b>  | 12        | 0.000                 | 0.000              |                |                |
| <b>Total</b>          | 17        | 0.005                 |                    |                |                |
| <b>1.0 - 0.5 mm</b>   | <b>df</b> | <b>Sum of squares</b> | <b>Mean square</b> | <b>F value</b> | <b>p value</b> |
| <b>Between Groups</b> | 5         | 0.019                 | 0.004              | 98.704         | 0.000          |
| <b>Within Groups</b>  | 12        | 0.000                 | 0.000              |                |                |
| <b>Total</b>          | 17        | 0.020                 |                    |                |                |
| <b>0.5 - 0.25 mm</b>  | <b>df</b> | <b>Sum of squares</b> | <b>Mean square</b> | <b>F value</b> | <b>p value</b> |
| <b>Between Groups</b> | 5         | 0.012                 | 0.002              | 174.157        | 0.000          |
| <b>Within Groups</b>  | 12        | 0.000                 | 0.000              |                |                |
| <b>Total</b>          | 17        | 0.012                 |                    |                |                |
| <b>&lt; 0.25 mm</b>   | <b>df</b> | <b>Sum of squares</b> | <b>Mean square</b> | <b>F value</b> | <b>p value</b> |
| <b>Between Groups</b> | 5         | 0.008                 | 0.002              | 139.020        | 0.000          |
| <b>Within Groups</b>  | 12        | 0.000                 | 0.000              |                |                |
| <b>Total</b>          | 17        | 0.008                 |                    |                |                |
